# Supplementary material
Source: bioRxiv or medRxiv preprint supplement (https://www.biorxiv.org/highwire/filestream/106004/field_highwire_adjunct_files/2/250845-3.pdf)
Supplement: Supplementary file [file 250845-3.pdf]

1 **Supplementary Material**

2 **Low spatial structure and selection against secreted virulence factors attenuates**  
3 **pathogenicity in *Pseudomonas aeruginosa***

4

5 Elisa T. Granato<sup>1,2</sup>, Christoph Ziegenhain<sup>3,4</sup>, Rasmus L. Marvig<sup>5</sup>, Rolf Kümmerli<sup>1</sup>

6 <sup>1</sup>Department of Plant and Microbial Biology, University of Zurich, Zurich, Switzerland.

7 <sup>2</sup>Department of Zoology, University of Oxford, Oxford, United Kingdom.

8 <sup>3</sup>Department Biology II, Ludwig-Maximilians-University, Munich, Germany.

9 <sup>4</sup>Department of Cell and Molecular Biology, Karolinska Institutet, Solna, Sweden.

10 <sup>5</sup>Center for Genomic Medicine, Rigshospitalet, Copenhagen, Denmark.

11

12 **Supplementary Methods**

13

14 **Supplementary References**

15

16 **Supplementary Figures S1-S6**

17

18 **Supplementary Table S2**

19 Supplementary Tables S1 and S3 are available as separate files.

## 20 **Supplementary Methods**

### 21 **Starting the experimental evolution**

22 At the start of the experimental evolution, overnight cultures of PAO1-*gfp* were grown under  
23 shaken conditions (190-200 rpm) at 37°C for 18 h, washed with NaCl (0.85%) and adjusted to an  
24 OD600 of 1.0. After this point, all steps throughout the experimental evolution were conducted at  
25 25°C. For evolution on agar plates and for each replicate line, 50 µL of cell suspension were spread  
26 onto a small RDM-Ch agar plate (diameter 60 mm). Approximately 100 age-synchronized L4  
27 stage *C. elegans* nematodes were then added to each plate in the treatment “agar plate with host”,  
28 and all plates were incubated for 48 h before the first transfer. For evolution in liquid cultures, the  
29 same OD-adjusted bacterial suspensions were diluted 10<sup>-4</sup> into 5 mL of liquid RDM-Ch in 15 mL  
30 culture tubes. Approximately 2500 age-synchronized L4 stage *C. elegans* nematodes were then  
31 added to each tube for the treatment “liquid culture with host”, and all tubes were incubated for  
32 48 h under “rolling” conditions (160 rpm) in a horizontal position to avoid clumping of the worms.  
33 The number of nematodes added at the beginning of the experimental evolution (and at each  
34 transfer) was calculated based on the total number of bacteria per plate or culture tube and then  
35 kept constant throughout the experiment. We aimed to keep the approximate ratio between  
36 bacterial cells and nematodes equal across treatments, and since liquid cultures harbored more  
37 bacteria than plates, we adjusted the number of nematodes accordingly.

38

### 39 **Transfers conducted during experimental evolution**

40 For all agar plates, bacteria were replica-plated to a fresh RDM-Ch plate, using a custom made  
41 replica tool covered in sterilized velvet. In the treatment “agar plate with host”, the plates  
42 containing the nematodes from the previous round were then rinsed off the plate with sterile NaCl

43 (0.85%), washed thoroughly to avoid additional transfer of bacteria, and 10% of the nematode  
44 suspension was transferred to the new plate. Since *P. aeruginosa* is highly virulent towards  
45 *C. elegans*, the transferred worms were carcasses. A fresh batch of ~100 synchronized L4 stage  
46 nematodes was then added to the plates. For the “liquid culture without host” treatment, 50  $\mu$ L of  
47 the culture was used to inoculate 4.95 mL of fresh RDM-Ch medium. For the “liquid culture with  
48 host” treatment, culture tubes were centrifuged slowly (~200 g, 5 min) to pellet the nematodes,  
49 and 50  $\mu$ L of the supernatant (containing the bacteria) was used to inoculate 4.95 mL of fresh  
50 RDM-Ch medium. The pelleted nematodes were then washed thoroughly with sterile NaCl  
51 (0.85%), and 10% of the nematode suspension was transferred to the new culture tube. Analogous  
52 to the agar treatment, most transferred worms were carcasses due to the high virulence levels of  
53 *P. aeruginosa*. A fresh batch of ~2500 synchronized L4 nematodes was then added to the tubes.

54

### 55 **Killing Assays in liquid culture**

56 Evolved bacterial populations and the ancestral wildtype strain were re-grown from freezer stocks  
57 in LB medium overnight, washed with sterile NaCl (0.85%), adjusted to OD<sub>600</sub>=1.0 and diluted  
58  $10^{-4}$  into 5 mL of liquid RDM-Ch medium in a 15 mL culture tube. Three replicate tubes were  
59 inoculated per tested population. After an incubation period of 48 h (shaken conditions, 160-165  
60 rpm), the OD<sub>600</sub> was measured and cells were pelleted through centrifugation. A volume  $\leq$  500  
61  $\mu$ L of the supernatant was removed, corresponding to the volume containing ~2500 synchronized  
62 L4 nematodes that were subsequently added. Culture tubes were then incubated for 48 h under  
63 “rolling” conditions at 160 rpm in a horizontal position to avoid clumping of the worms. At 24 h  
64 and 48 h after adding the nematodes, the level of virulence was determined by counting the fraction  
65 of dead worms. Small aliquots were taken from the main culture and dropped onto an NGM plate.

66 After a short drying period, nematodes were prodded repeatedly with a metal rod and counted as  
67 dead if they did not show any signs of movement. Dead worms were immediately removed to  
68 avoid double counting.

69

### 70 **Killing Assays on agar plates**

71 Evolved bacterial populations and the ancestral wildtype strain were re-grown from freezer stock  
72 in LB medium overnight, washed with sterile NaCl (0.85%), adjusted to OD<sub>600</sub>=1.0 and 50  $\mu$ L  
73 were spread on RDM-Ch agar plates. Six replicate plates were inoculated per tested population.  
74 Plates were incubated for 48 h, and an aliquot of synchronized L4 nematodes suspended in liquid  
75 was then added to the plates. The nematodes had been previously starved on empty NGM plates  
76 for 24 h. The starting number of nematodes ranged from 20 to 60 worms per plate and was  
77 immediately determined by manual counting. Plates were then incubated further and at 24 h and  
78 48 h after adding the nematodes, the level of virulence was determined by counting the number of  
79 dead worms on the plates, as described for the killing assay in liquid culture. For both killing  
80 assays, each individual liquid culture and plate was visually checked for egg or L1 larvae  
81 development and we never observed any live larvae. We can therefore assume that the nematodes  
82 did not successfully reproduce during these experiments.

83

### 84 **Freezing of evolved populations**

85 At the end of the experimental evolution, evolved populations were frozen for further analysis as  
86 follows. For the two agar plates treatments, the bacterial lawn was washed off with sterile NaCl  
87 (0.85%), mixed vigorously, diluted  $10^{-3}$  into 3 mL of liquid LB medium in 6-well plates, and  
88 incubated under shaken conditions (100 rpm) for 18 h. For the “liquid culture with host” treatment,

89 culture tubes were first centrifuged slowly (~200 g, 5 min) to pellet the nematodes. Then, 25  $\mu$ L  
90 of the supernatant (containing bacteria) was used to inoculate 2.475 mL liquid LB medium in 6-  
91 well plates. For the “liquid culture without host” treatment, 25  $\mu$ L of the bacterial culture was used  
92 to inoculate 2.475 mL liquid LB medium in 6-well plates. All plates were then incubated under  
93 shaken conditions (100 rpm) for 18 h. Finally, 900  $\mu$ L of each well was mixed 1:1 with sterile  
94 glycerol (85%) and frozen at -80°C in separate cryotubes.

95

### 96 **Isolation of single clones**

97 To isolate single clones, evolved bacterial populations were re-grown from freezer stock in 3 mL  
98 LB medium for 20 h (160 rpm) and adjusted to OD<sub>600</sub>=1.0. Then, 200  $\mu$ L of 10<sup>-6</sup> and 10<sup>-7</sup> dilutions  
99 were spread on large LB agar plates (diameter 150 mm), and plates were incubated at room  
100 temperature (~20-25°C) for 48 h. Twenty colonies were then randomly picked for each population  
101 and inoculated into 100  $\mu$ L LB medium in a 96-well plate. Plates were incubated for 24 h under  
102 shaken conditions (165 rpm) before adding 100  $\mu$ L sterile glycerol (85%) to each well, sealing the  
103 plates with adhesive foil and freezing at -80°C.

104

### 105 **Pyoverdine measurements**

106 Single clones were re-grown from freezer stocks in 200  $\mu$ L LB medium for 20 h (165 rpm) in 96-  
107 well plates. Then, for each well, cultures were first diluted 10<sup>-2</sup> in NaCl (0.85%) and then 10<sup>-2</sup> into  
108 liquid RDM-Ch to a final volume of 200  $\mu$ L in a 96-well plate. Plates were then incubated for 24 h  
109 under shaken conditions (165 rpm) and OD<sub>600</sub> and pyoverdine-specific fluorescence (emission  
110 400 nm, excitation 460 nm) were measured in a plate reader through single endpoint  
111 measurements. Multiple wells inoculated with the ancestral wildtype as well as blank medium

112 controls were included in every plate. Additionally, the pyoverdine knockout mutant PAO1-  
113  $\Delta pvdD-gfp$  was included as a negative control for pyoverdine fluorescence.

114

### 115 **Pyocyanin measurements**

116 Single clones were re-grown from freezer stocks in 200  $\mu$ L LB medium for 20 h (165 rpm) in 96-  
117 well plates. Then, for each well, cultures were first diluted  $10^{-2}$  in NaCl (0.85%) and then  $10^{-2}$  into  
118 liquid LB to a final volume of 1 mL in 24-well plates. Plates were then incubated for 24 h under  
119 shaken conditions (165 rpm). The well content was then transferred to 1.5 mL reaction tubes,  
120 vortexed thoroughly, and centrifuged to pellet bacterial cells. From each tube, three aliquots of  
121 150  $\mu$ L of the cell-free supernatant were then transferred to 96-well plates, and pyocyanin was  
122 quantified by measuring OD at 691 nm in a plate reader. Multiple wells inoculated with the  
123 ancestral wildtype as well as blank medium controls were included in every plate. Additionally,  
124 the Rhl-quorum-sensing deficient knockout mutant PAO1- $\Delta rhlR$  was included as a negative  
125 control for pyocyanin production.

126

### 127 **Protease measurements**

128 Single clones were re-grown from freezer stocks in 200  $\mu$ L LB medium for 20 h (165 rpm) in 96-  
129 well plates. Then, for each well, 1  $\mu$ L of bacterial culture was dropped into a single well of a 24-  
130 well plate filled with skim milk agar (5  $\text{gL}^{-1}$  LB, 4% (m/V) skim milk powder, 15  $\text{gL}^{-1}$  agar) and  
131 plates were incubated for 20 h. Pictures of the plates were then taken with a standard digital camera  
132 and analyzed with the Image Analysis Software *ImageJ*. The diameter of the clear halo around the  
133 bacterial colony and the diameter of the colony itself was measured, and protease production was  
134 calculated using the following formula:

135 
$$\text{relative protease production} = \frac{\text{diameter}(\text{halo}) - \text{diameter}(\text{colony})}{\text{diameter}(\text{colony})}.$$

136 Multiple wells inoculated with the ancestral wildtype as well as blank medium controls were  
137 included in every plate. Additionally, the Las-quorum-sensing deficient knockout mutant PAO1-  
138  $\Delta\text{lasR}$  was included as a negative control for protease production.

139

#### 140 **Biofilm measurements**

141 Single clones were re-grown from freezer stocks in 200  $\mu\text{L}$  LB medium for 20 h (165 rpm) in 96-  
142 well plates. Then, for each well, the air liquid biofilm was manually removed from the surface  
143 with a sterile pipette tip. Cultures were then diluted  $10^{-2}$  into 100  $\mu\text{L}$  LB medium in a 96-well  
144 round bottom plate (No. 83.3925.500, Sarstedt, Germany) and incubated under static conditions  
145 for 24 h. After removal of the air liquid biofilm, the growth medium containing the planktonic  
146 cells was transferred to a fresh flat-bottom 96-well plate and OD was measured at 550 nm in a  
147 plate reader. In the plate containing the cells attached to the plastic surface, 100  $\mu\text{L}$  of crystal violet  
148 (0.1%) was added to each well and plates were incubated at room temperature for 30 min. Then,  
149 the wells were carefully washed several times with ddH<sub>2</sub>O, left to dry at room temperature for 30  
150 min, and 120  $\mu\text{L}$  DMSO was added to each well before a final incubation step of 20 min at room  
151 temperature. Finally, OD was measured at 570 nm in a plate reader, and the production of surface-  
152 attached biofilms was quantified by calculating the “Biofilm Index” (OD<sub>570</sub>/OD<sub>550</sub>) for each  
153 well [1]. Multiple wells inoculated with the ancestral wildtype as well as blank medium controls  
154 were included in every plate. Additionally, the knockout mutant MPAO1- $\Delta\text{pelA}$ - $\Delta\text{pslA}$  was  
155 included as a negative control for biofilm production.

156 **Genomic DNA isolation**

157 Clones were re-grown from freezer stocks in 3 mL LB medium in 15 mL culture tubes at 190 rpm  
158 for 20-24 h. Genomic DNA was then extracted from 1 mL of culture using the *GenElute*<sup>TM</sup>  
159 *Bacterial Genomic DNA Kit* (Sigma-Aldrich, Switzerland) according to the manufacturer's  
160 instructions. At the final step of the isolation protocol, the DNA was eluted in TRIS-HCl without  
161 the addition of EDTA to avoid interference with sequencing library preparation. DNA  
162 concentration was quantified using the *QuantiFluor*<sup>®</sup> *dsDNA System* (Promega, Switzerland)  
163 according to the manufacturer's instructions, and diluted to a concentration of 10 ng/ $\mu$ L for use in  
164 subsequent library preparation.

165

166 **Preparation of sequencing library and whole genome sequencing**

167 Sequencing libraries were constructed using the Nextera XT Kit (Illumina, USA). Briefly, 0.8 ng  
168 of gDNA per sample was tagmented at 55 °C for 10 min. Libraries were dual-indexed and  
169 amplified in the subsequent library PCR. Sequencing libraries were cleaned up using cleanNA  
170 SPRI beads (GC biotech, Netherlands) according to the manufacturer's protocol. Next, DNA  
171 concentration was quantified using the *QuantiFluor*<sup>®</sup> *dsDNA System* (Promega, Germany) and  
172 equal amounts of library per sample pooled. Finally, the molarity of the library pool was  
173 determined using the *dsDNA High Sensitivity Assay* for the *Bioanalyzer 2100* (Agilent  
174 Technologies, Germany). Sequencing was performed 2x150 bp by Microsynth (Balgach,  
175 Switzerland) on a NextSeq500 (Illumina, USA).

176

177 **Variant analysis**

178 Annotated variant calls were only retained if more than 80% of reads contained the alternate base



179 and if quality scores (Phred-scaled probability of sample reads being homozygous reference) were  
180 at least 50 (i.e.  $P \leq 10E-5$ ). All variants already occurring in the ancestral wildtype strain were  
181 discarded for analysis of the evolved clones. Of the 144 sequenced clones, three had to be discarded  
182 before analysis due to low coverage, and one for likely being a mixture of two different genotypes  
183 due to contamination. Read alignments covering genes with multiple variants (either in the same  
184 or different clones) were manually inspected to remove spurious calls in 19 loci (PA2139-PA2140,  
185 PA4875-PA4876, PA3503-PA3504, PA2127-PA2128, PA0604-PA0605, PA0366-PA0367,  
186 PA0148-PA0149, PA5024, PA4526-PA4527, PA3969a-PA3970, PA1352-PA1353, PA4280.2-  
187 PA4280.3, PA2000-PA2001, PA1234-PA1235, PA4838-PA4839, PA2373, PA2232, PA2296,  
188 and PA2492).

189

#### 190 **Analysis of parallelism and order of mutations**

191 We based our calculation of the relative rates of nonsynonymous to synonymous SNPs (dN/dS)  
192 on a 25% chance that a random substitution mutation would be synonymous. In the case of the  
193 *P. aeruginosa* genomes we analyzed here, out of a total of 16,779,042 possible SNP mutations  
194 within the genes (5,593,014 bp of coding sequences, multiplied by three possible mutations in each  
195 position), only 4,237,247 SNP mutations would cause a synonymous change.

196 To infer the order of mutations, we compared the mutations that were called across strains from  
197 the 16 populations, and identified 18 loci (i.e. genes or an intergenic regions) that were mutated in  
198 at least two populations. The Supplementary Table S3 lists all mutations in the 18 loci that were  
199 mutated in at least two populations, and also lists mutations in *pilE pilG, pilM, pilN, pilO, pilU,*  
200 *pilW,* and *pilZ* that were only mutated in a single population. To order two given mutations in a  
201 given strain, we checked whether other strains from the same population carried only one of these

202 two mutations, as this would indicate that the other mutation appeared second in the same strain.  
203 We observed no mutational patterns inconsistent with this model.

204

## 205 **Statistical Analysis**

206 To test for differences in evolved levels of virulence and virulence factor production compared to  
207 wildtype levels (Fig. 1BC, Fig.2), we used nonparametric Wilcoxon rank sum tests. We chose this  
208 test because it is purely based on the order in which observations from two samples fall (the two  
209 samples in our case being the wildtype measurements and the evolved clones/populations) and  
210 does not assume that the underlying data are normally distributed. To compare treatment effects  
211 on evolved levels of virulence (Fig. 1BC), we used linear mixed models as implemented in the R  
212 package lme4 (<https://CRAN.R-project.org/package=lme4>). In this framework, we used spatial  
213 structure (high/low) and host presence (yes/no) as main effects and also included the two-way  
214 interaction term. Additionally, mixed linear models allow to account for random effects, which  
215 explain a certain level of variance in the data, but are not relevant for the biological question  
216 addressed. In our analysis of treatment effects on virulence levels, we implemented the replicated  
217 populations per evolved lineage as random effect. To compare treatment effects on evolved levels  
218 of virulence factor production (Fig. 2), we used Bayesian statistics as implemented in the R  
219 package MCMCglmm [2]. The underlying logic of this method matches the one for mixed linear  
220 models described above, but it is based on a non-parametric approach, required when the data is  
221 not normally distributed, as was the case for the evolved virulence factor production levels.  
222 Specifically, the approach performs generalized linear mixed models based on a Markov chain  
223 Monte Carlo (MCMC) algorithm. We analyzed spatial structure (high/low) and host presence  
224 (yes/no) as fixed effects as well as the interaction between the two factors. The MCMCglmm

225 method is based on iterative processes and therefore requires the specification of appropriate prior  
226 distributions. We chose priors according to the package guidelines (MCMCglmm package course  
227 notes; <https://cran.r-project.org/web/packages/MCMCglmm>). From the posterior distributions  
228 generated by the Bayesian iteration, we report  $P_{\text{MCMC}}$ , representing the Bayesian equivalent of a  
229 P-value. Treatment effects were considered significant when  $P_{\text{MCMC}} \leq 0.05$ . Since Bayesian  
230 statistics are based on iterative processes, with outcomes slightly differing across runs, we repeated  
231 each analysis five times and report mean  $P_{\text{MCMC}}$  values in the main text and in Table S1. To test  
232 for segregation of evolutionary treatments groups (Fig. 3A), we conducted a PERMANOVA  
233 analysis. This is a non-parametric statistical test used to compare groups of objects and test the  
234 null hypothesis that spatial parameters like centroids and dispersion are equivalent for all groups  
235 [3]. To test for correlation between virulence index and evolved virulence levels (Fig. 3B, S4) and  
236 between virulence levels in different killing assays (Fig. S1), we used linear models, which means  
237 that we only implemented fixed effects and no random effects. To test for the effect of  
238 nonsynonymous SNPs and INDELS on virulence factor production (Fig. 5, S6) we used linear  
239 models with “gene of interest mutated (yes/no)” as fixed effect. For a complete list of statistical  
240 tests conducted, see Table S1. All analyses were performed in R (<http://www.r-project.org>).

241

## 242 **References**

- 243 1. Savoia D, Zucca M. Clinical and environmental Burkholderia Strains: Biofilm production  
244 and intracellular survival. *Curr Microbiol.* 2007;54(6):440–4.
- 245 2. Hadfield JD. MCMC methods for multi-response generalized linear mixed models: The  
246 MCMCglmm R package. *J Stat Softw.* 2010;33(2):1–22.
- 247 3. Anderson MJ. Permutational Multivariate Analysis of Variance (PERMANOVA). In:

248

Wiley StatsRef: Statistics Reference Online. 2017. p. 1–15.

249

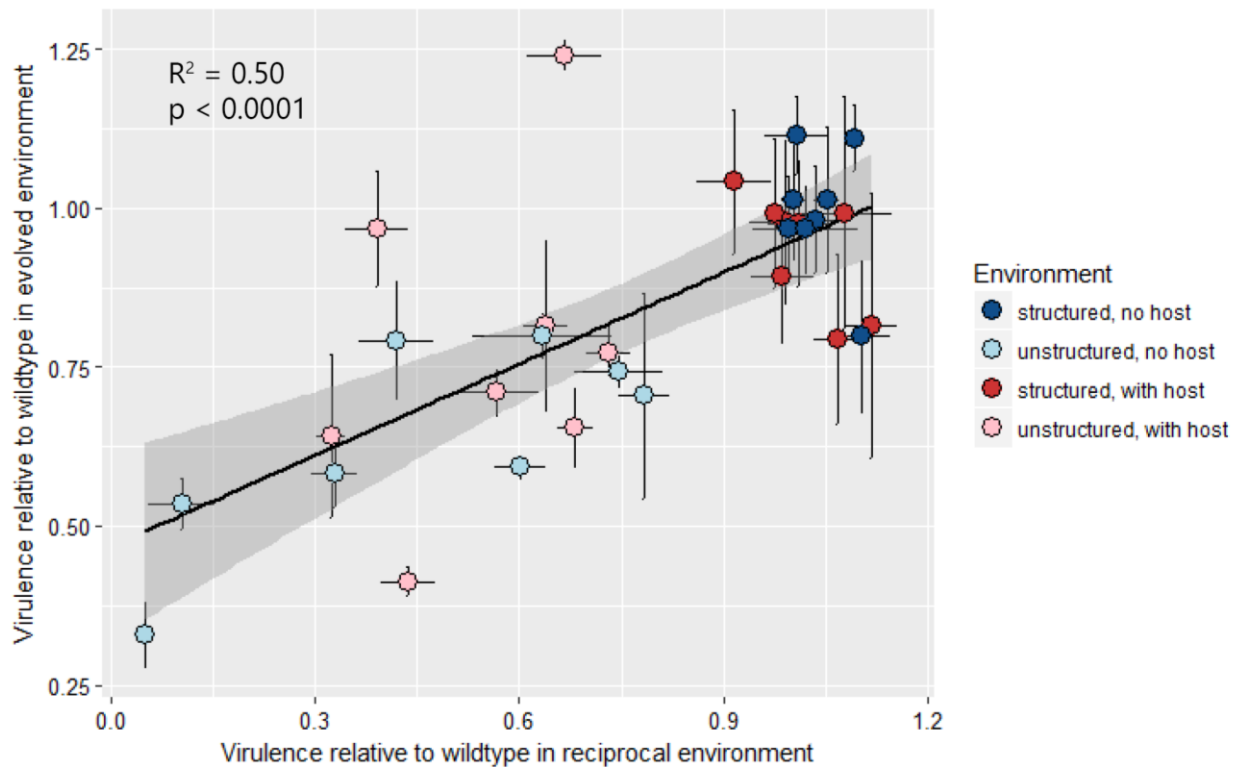

250 **Fig. S1. Virulence measured in two different assays yields highly similar results.** 32 evolved  
 251 populations were tested for their virulence towards the nematode *C. elegans*. *Y* axis shows  
 252 virulence tested in the environment the populations evolved in: populations that evolved on agar  
 253 plates tested on agar plates, populations that evolved in liquid culture tested in liquid culture. *X*  
 254 axis shows virulence when tested in the reciprocal environment: populations that evolved on agar  
 255 plates tested in liquid culture, populations that evolved in liquid tested on agar plates. Virulence  
 256 was quantified as percent nematodes killed at 24 h post infection, scaled to the ancestral wildtype,  
 257 and averaged across three to six replicates per population. Individual dots represent average  
 258 virulence of a population. Error bars denote the standard error of the mean. See Table S1 for details  
 259 on statistical analysis.

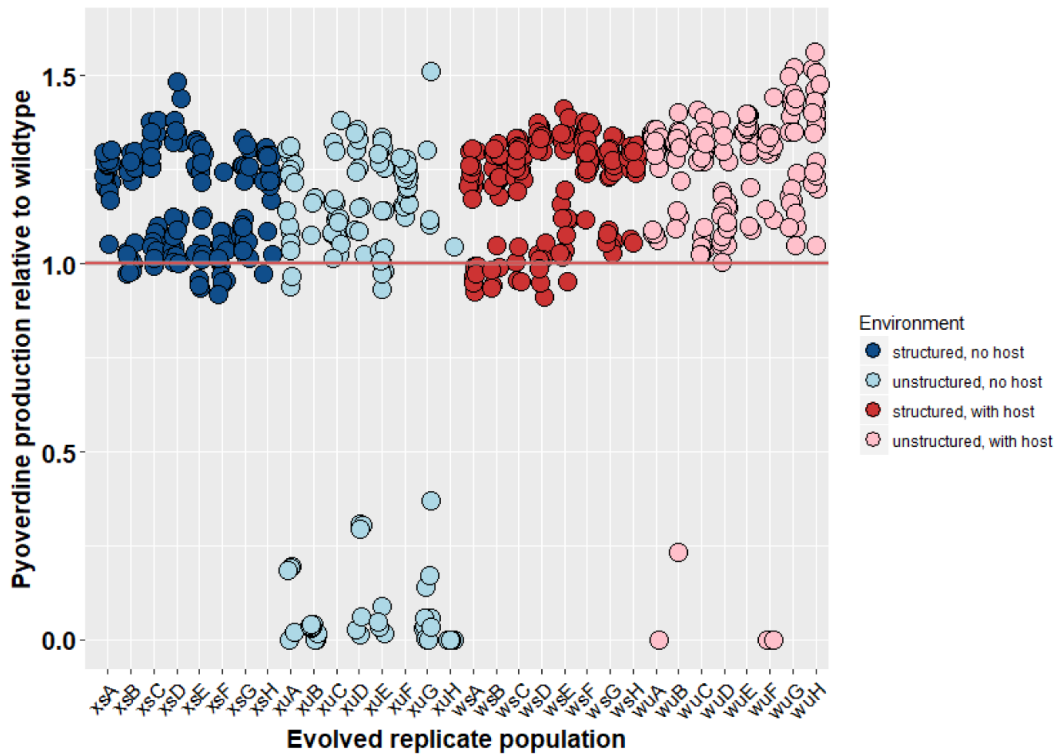

260 **Fig. S2. Loss of pyoverdine production evolved in independent replicate populations.**  
 261 Pyoverdine production levels were determined for 640 evolved *P. aeruginosa* clones (20 clones  
 262 per evolved population), and compared to the ancestral wildtype (mean  $\pm$  95 % confidence  
 263 intervals indicated as red lines and shaded areas, respectively). Clones with low or no pyoverdine  
 264 production evolved in 6 out of 8 independent populations in the host-free unstructured  
 265 environment, and in 2 out of 8 independent populations in the with-host unstructured environment.

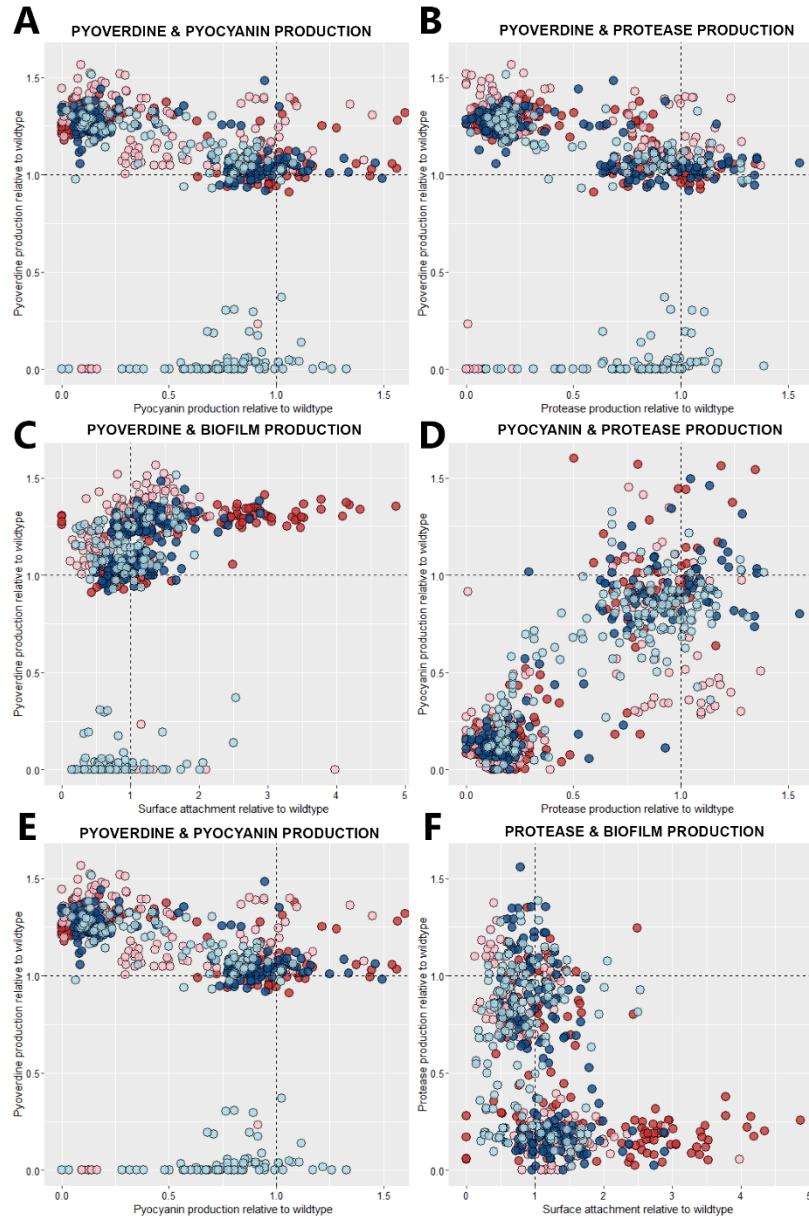

266 **Fig. S3. Pairwise comparisons of the production of different secreted virulence factors.** 640  
 267 evolved clones were tested for their expression of four secreted virulence factors. Plots each show  
 268 pairwise comparisons of the production of two virulence factors for all clones. All values scaled  
 269 to the ancestral wildtype. Colours represent the different environments the populations evolved in.  
 270 Pyoverdine production against pyocyanin production (A), protease production (B) and biofilm  
 271 production (C); pyocyanin against protease production (D) and biofilm production (E); protease  
 272 production against biofilm production (F).

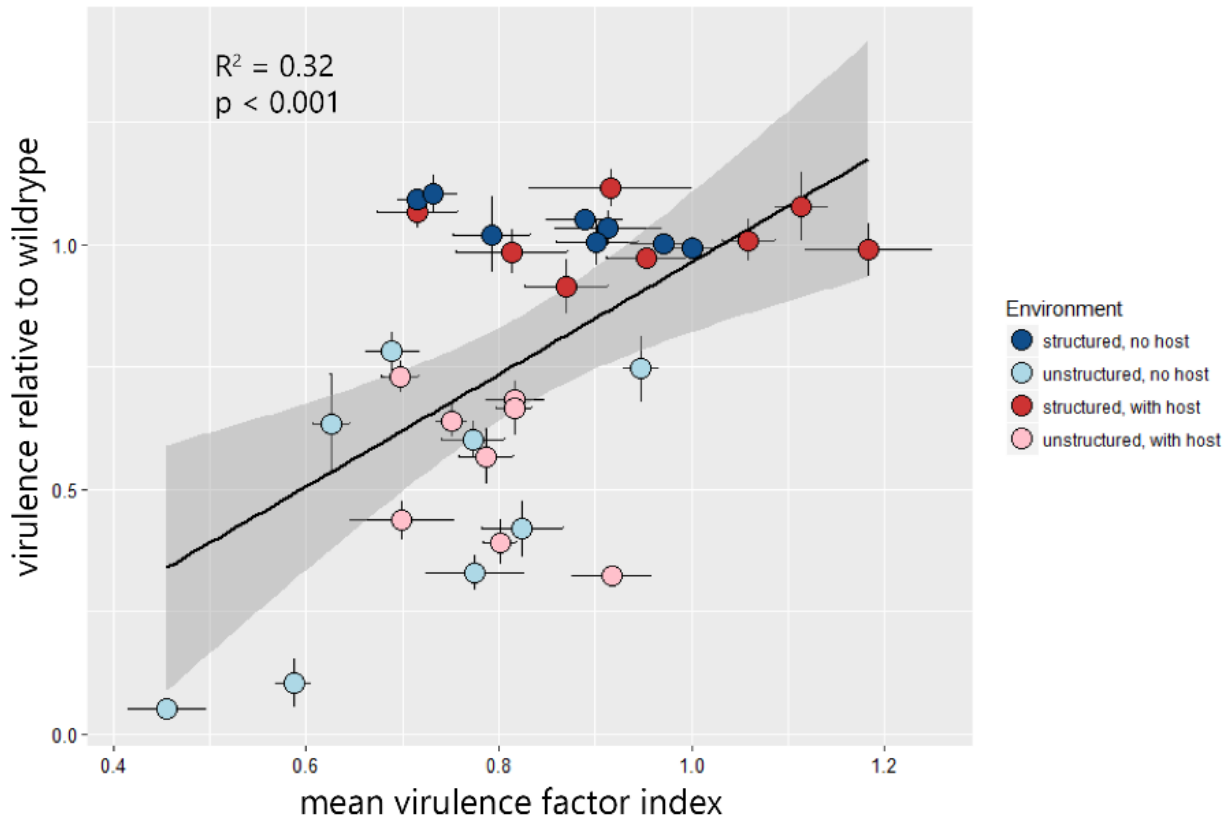

273 **Fig. S4. Decrease in virulence explained by combining the expression profile of four virulence**  
 274 **factors in evolved clones.** For each of 640 evolved clones, the “virulence factor index” was  
 275 calculated by summing over production levels of four secreted virulence factors and scaling to the  
 276 ancestral wildtype. X axis shows average virulence indices, while y axis shows average virulence  
 277 levels scaled to the wildtype. Individual dots represent average values across 20 clones for each  
 278 evolved population, coloured by the environment they evolved in. Virulence was tested in the  
 279 reciprocal environment: populations that evolved on agar plates tested in liquid culture,  
 280 populations that evolved in liquid tested on agar plates. Virulence was quantified as percent  
 281 nematodes killed at 24 h post infection, scaled to the ancestral wildtype, and averaged across three  
 282 to six replicates per population. Error bars denote the standard error of the mean. See Table S1 for  
 283 details on statistical analysis.



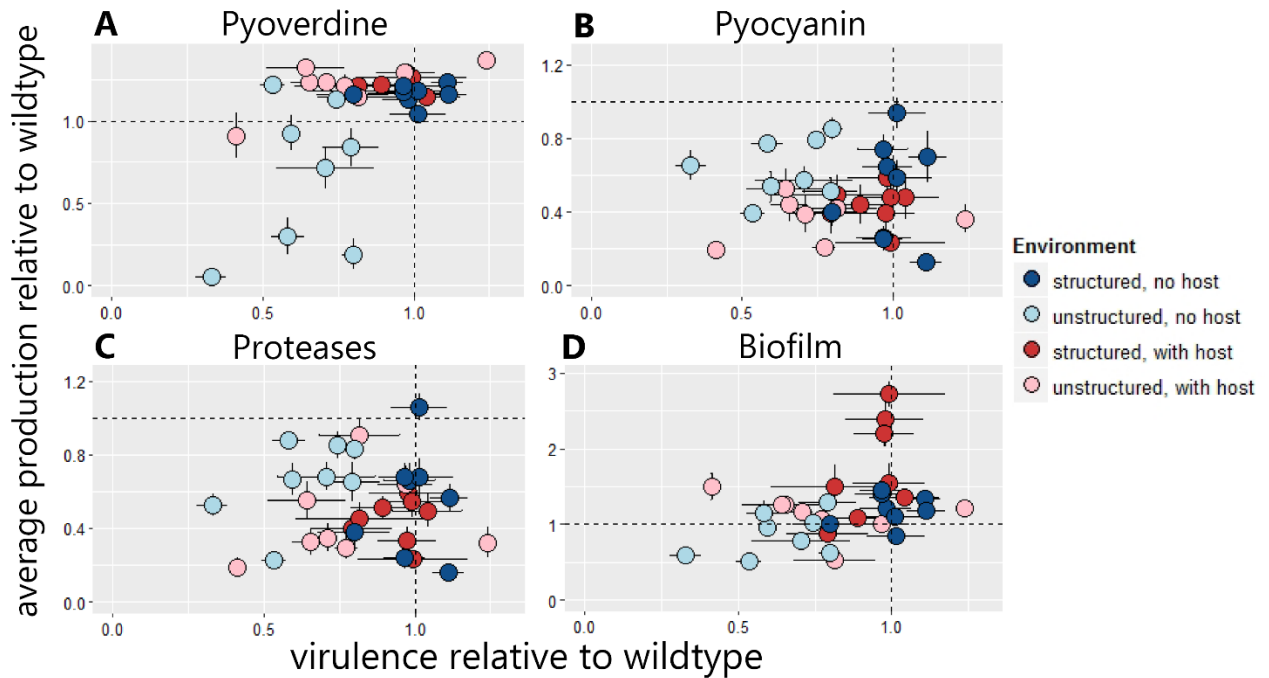

284

285 **Fig. S5. No single virulence factor can fully explain evolved virulence levels.** Virulence levels  
 286 of 32 evolved populations were determined and plotted against average virulence factor production  
 287 in 20 evolved clones per population. All values scaled to the ancestral wildtype. Error bars  
 288 represent the standard error of the mean. (A) Virulence plotted against pyoverdine production. (B)  
 289 Virulence plotted against pyocyanin production. (C) Virulence plotted against protease production.  
 290 (D) Virulence plotted against production of surface-attached biofilms. Colours represent the  
 291 different environments the populations evolved in.

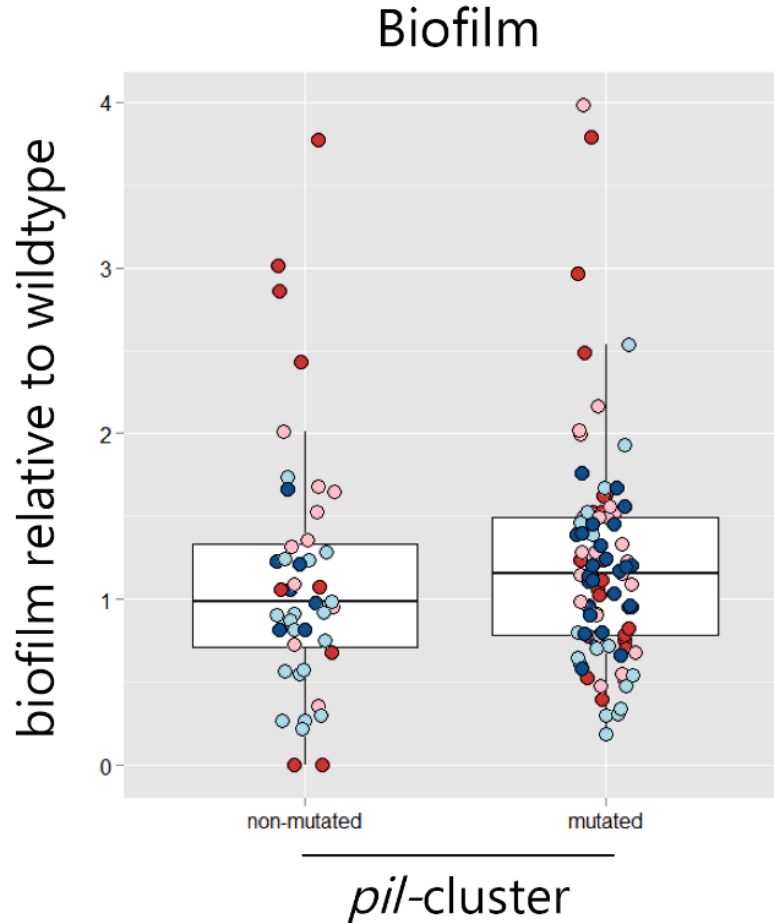

292 **Fig. S6. Biofilm production not affected by mutations in the *pil* gene cluster.** Whole genome  
 293 sequencing was performed on 140 evolved clones, and SNPs and INDELs in genes related to  
 294 biofilm production were tested for their effect on production levels of surface-attached biofilms.  
 295 Clones with  $\geq 1$  detected SNP or INDEL in the respective gene are labelled “mutated”, clones with  
 296 no SNPs or INDELs detected in this region are labelled “non-mutated”. Y axis values are scaled  
 297 to biofilm production levels of the ancestral wildtype. We did not detect a difference in biofilm  
 298 production levels in clones with mutations in the *pil* gene cluster (*pilM*, *pilQ*, *pilO*, *pilU*, *pilD*,  
 299 *pilA*, *pilZ*, *pilY1*, *pilW*, *pilN*, *pilE*, *pilB*, *pilS*, *pilR*, *pilT*, *pilG*) when compared to clones without  
 300 mutations in these genes ( $p = 0.64$ ). See Table S1 for details on statistical analysis.

301 **Table S2. Absolute killing levels in the ancestral wildtype and evolved populations.**

|                          | <b>Pre-evolution (ancestral WT)<sup>a</sup></b> |                                                      | <b>Post-evolution (evolved populations)<sup>b</sup></b> |                       |                       |                         |
|--------------------------|-------------------------------------------------|------------------------------------------------------|---------------------------------------------------------|-----------------------|-----------------------|-------------------------|
|                          |                                                 |                                                      | no host, structured                                     | no host, unstructured | with host, structured | with host, unstructured |
| <b>Killing on plates</b> | 83.9 %                                          | <b>Killing in evolved environment<sup>c</sup></b>    | 81.3 %                                                  | 43.2 %                | 76.4 %                | 52.9 %                  |
| <b>Killing in liquid</b> | 76.2 %                                          | <b>Killing in reciprocal environment<sup>d</sup></b> | 87.4 %                                                  | 40.5%                 | 85.5 %                | 49.3 %                  |

<sup>a</sup> averaged over 3-6 replicates depending on the killing assay (see methods for details)

<sup>b</sup> averaged over 8 replicate populations per treatment and 3-6 replicates per population (see methods for details)

<sup>c</sup> populations evolved on plates tested on plates, populations evolved in liquid tested in liquid; data shown in Fig. 1B relative to WT

<sup>d</sup> populations evolved on plates tested in liquid, populations evolved in liquid tested on plates; data shown in Fig. 1C relative to WT

302

303
